# Supplementary material for: Piezoelectric Yield of Single Electrospun Poly(acrylonitrile) Ultrafine Fibers Studied by Piezoresponse Force Microscopy and Numerical Simulations
Source: MDPI journal article supplement (doi:10.3390/polym16101305), 2024-05-07
Supplement: s1 [file s1]

Supplementary

# Piezoelectric Yield of Single Electrospun Poly(acrylonitrile) Ultrafine Fibers Studied by Piezoresponse Force Microscopy and Numerical Simulations

Margherita Montorsi <sup>1</sup>, Lorenzo Zavagna <sup>2</sup>, Lorenzo Scarpelli <sup>1,3</sup>, Bahareh Azimi <sup>4</sup>, Simone Capaccioli <sup>1,5,6</sup>, Serena Danti <sup>1,3,5</sup> and Massimiliano Labardi <sup>1,5,\*</sup>

<sup>1</sup> CNR-IPCF, Pisa Unit, Largo Pontecorvo 3, 56127 Pisa, Italy; margheritamontorsi@cnr.it (M.M.); l.scarpelli1@studenti.unipi.it (L.S.); simone.capaccioli@unipi.it (S.C.); serena.danti@unipi.it (S.D.)

<sup>2</sup> PEGASO Doctoral School in Life Sciences, University of Siena, Via Banchi di Sotto 55, 53100 Siena, Italy; l.zavagna@student.unisi.it

<sup>3</sup> Department of Civil and Industrial Engineering (DICI), University of Pisa, Largo Lazzarino 1, 56122 Pisa, Italy

<sup>4</sup> Department of Molecular Medical Surgical Pathology and Critical Area, University of Pisa, Via Savi 10, 56126 Pisa, Italy; bahareh.azimi@ing.unipi.it

<sup>5</sup> CISUP, Center for Instrumentation Sharing of the University of Pisa, Lungarno Pacinotti 43/44, 56126 Pisa, Italy

<sup>6</sup> Physics Department, University of Pisa, Largo Pontecorvo 3, 56127 Pisa, Italy

\* Correspondence: massimiliano.labardi@cnr.it; Tel.: +39-050-2214322

**Citation:** Montorsi, M.; Zavagna, L.; Scarpelli, L.; Azimi, B.; Capaccioli, S.; Danti, S.; Labardi, M.

Piezoelectric Yield of Single Electrospun Poly(acrylonitrile) Ultrafine Fibers Studied by Piezoresponse Force Microscopy and Numerical Simulations. *Polymers* **2024**, *16*, 1305. <https://doi.org/10.3390/polym16101305>

Academic Editor: Yinsong Si

Received: 4 April 2024

Revised: 30 April 2024

Accepted: 3 May 2024

Published: 7 May 2024

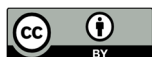

**Copyright:** © 2024 by the authors. Licensee MDPI, Basel, Switzerland. This article is an open access article distributed under the terms and conditions of the Creative Commons Attribution (CC BY) license (<https://creativecommons.org/licenses/by/4.0/>).

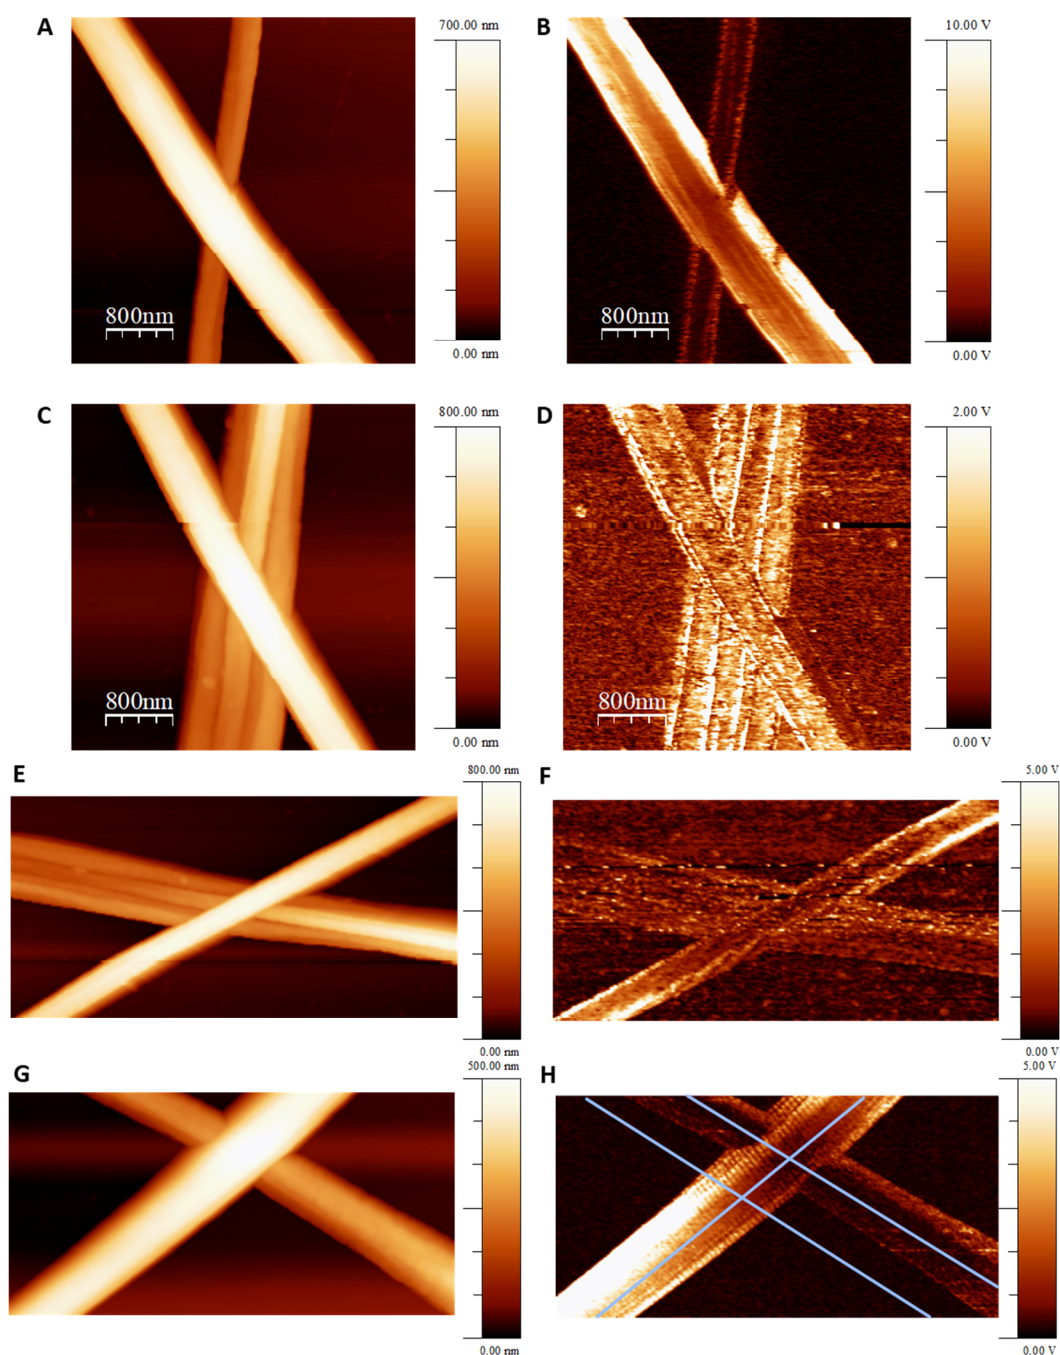

**Figure S1. (part A).** PFM maps of different PAN and PVDF electrospun fibers. (A) Topography: PVDF fiber, diameter 600 nm; PAN3 fiber, diameter 280 nm; (B) PFM, Scale 1 V = 34.4 pm/V (PVDF), 30.1 pm/V (PAN). (C) Topography: PAN1 fiber, diameter 650 nm; PAN3 (3 fibers), diameter 300–400 nm; (D) PFM, Scale 1 V = 6.6 pm/V. (E) Topography: PAN1 fiber, diameter 650 nm; PAN3 (3 fibers), diameter 300–400 nm; (F) PFM, Scale 1 V = 6.6 pm/V. (G) Topography: PVDF fiber, diameter 400 nm; PAN1 fiber, diameter 250 nm; (H) PFM, Scale 1 V = 11 pm/V.

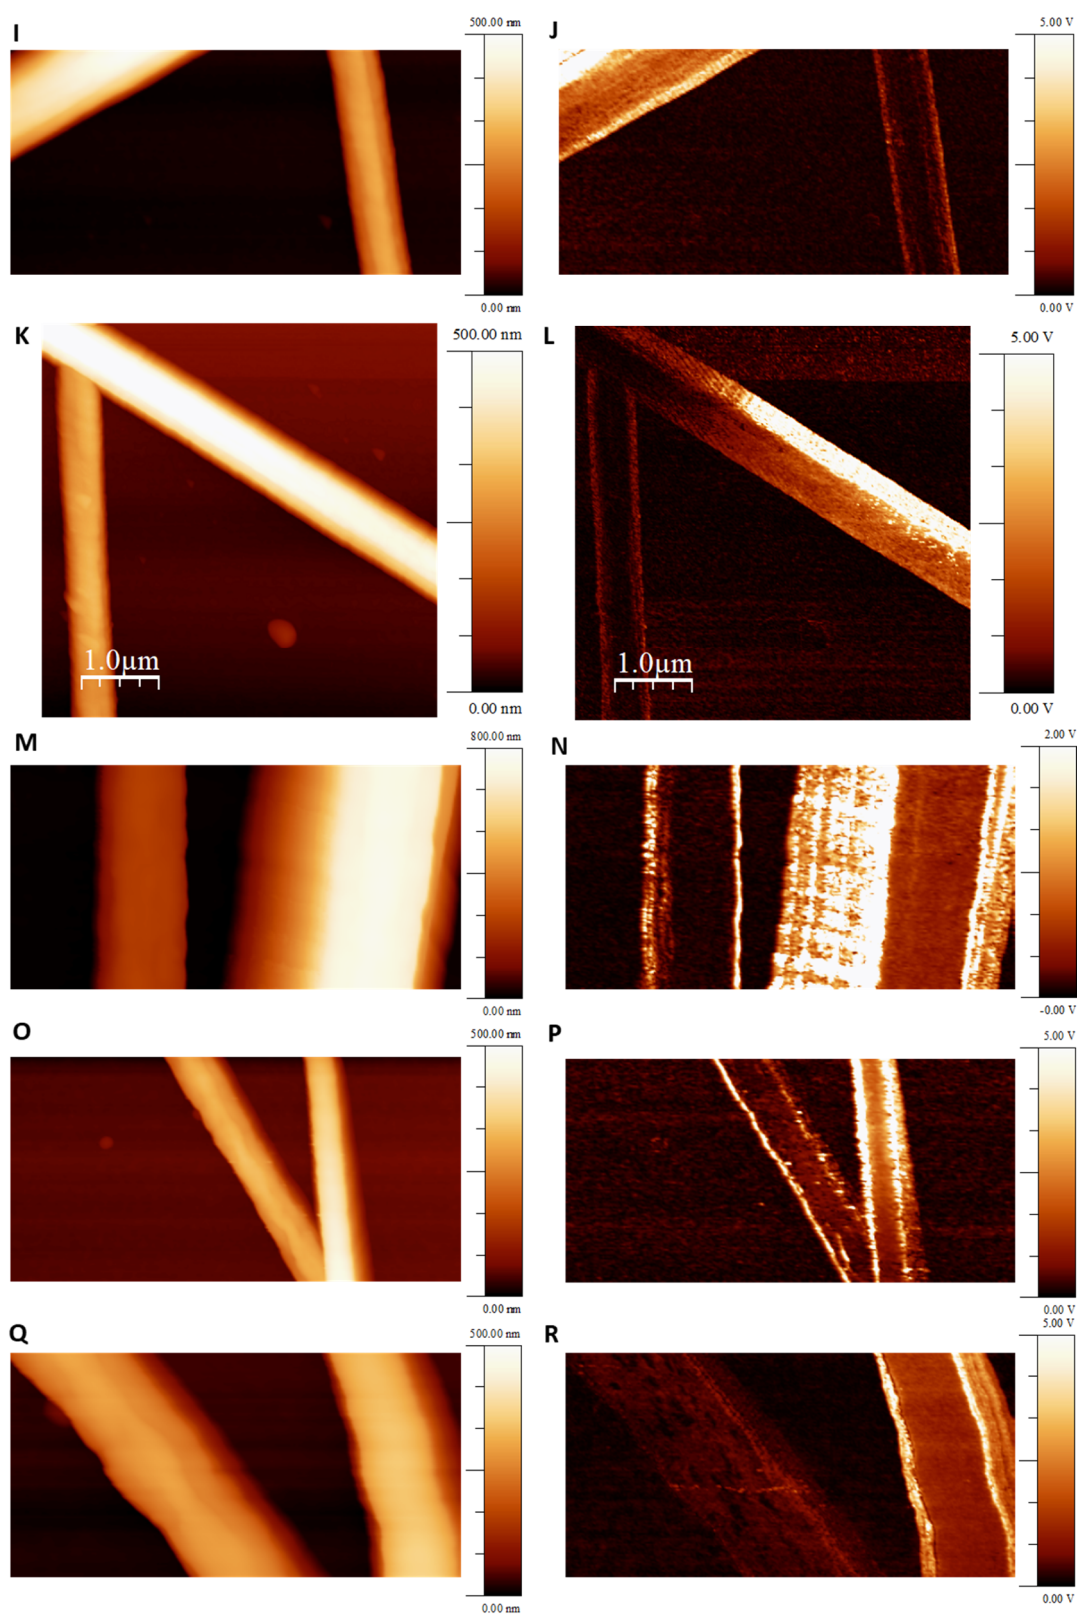

**Figure S1. (part B).** (I) Topography: PVDF fiber, diameter 400 nm; PAN3 fiber, diameter 300 nm; (J) PFM, Scale 1 V = 11 pm/V. (K) Topography: PAN1 fiber, diameter 450 nm; PAN3 fiber, diameter 300 nm; (L) PFM, Scale 1 V = 11 pm/V. (M) Topography: PVDF fiber, diameter 750 nm; PAN3 fiber, diameter 250 nm; (N) PFM, Scale 1 V = 113 pm/V. (O) Topography: PAN2 fiber, diameter 280 nm; PAN2 fiber, diameter 380 nm; (P) PFM, Scale 1 V = 28.6 pm/V. (Q) Topography: PAN2 fiber, diameter 280 nm; PAN2 fiber, diameter 380 nm; PFM, Scale 1 V = 113 pm/V.



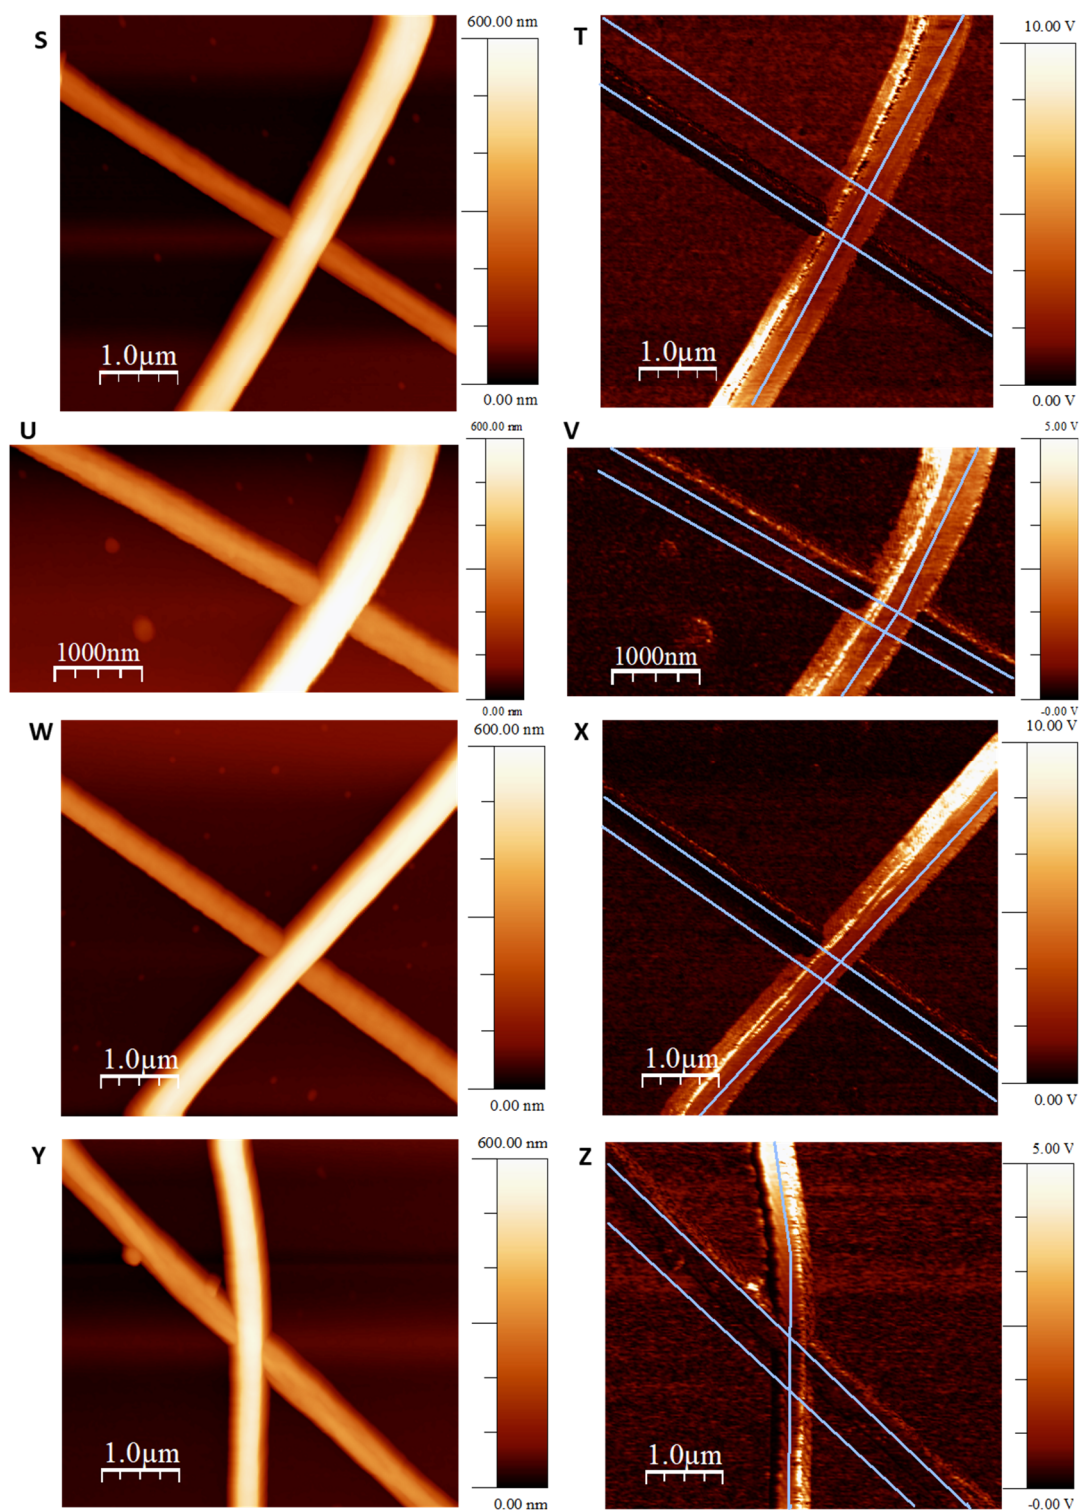

**Figure S1. (part C).** (S) Topography: PVDF fiber, diameter 500 nm; PANI fiber, diameter 230 nm; (T) PFM, Scale 1 V = 29.3 pm/V. (U) Topography: PVDF fiber, diameter 550 nm; PANI fiber, diameter 270 nm; (V) PFM, Scale 1 V = 29.3 pm/V. (W) Topography: PVDF fiber, diameter 500 nm; PANI fiber, diameter 250 nm; (X) PFM, Scale 1 V = 29.3 pm/V. (Y) Topography: PANI fiber, diameter 500nm; PANI fiber, diameter 300 nm; (Z) PFM, Scale 1 V = 29.3 pm/V.



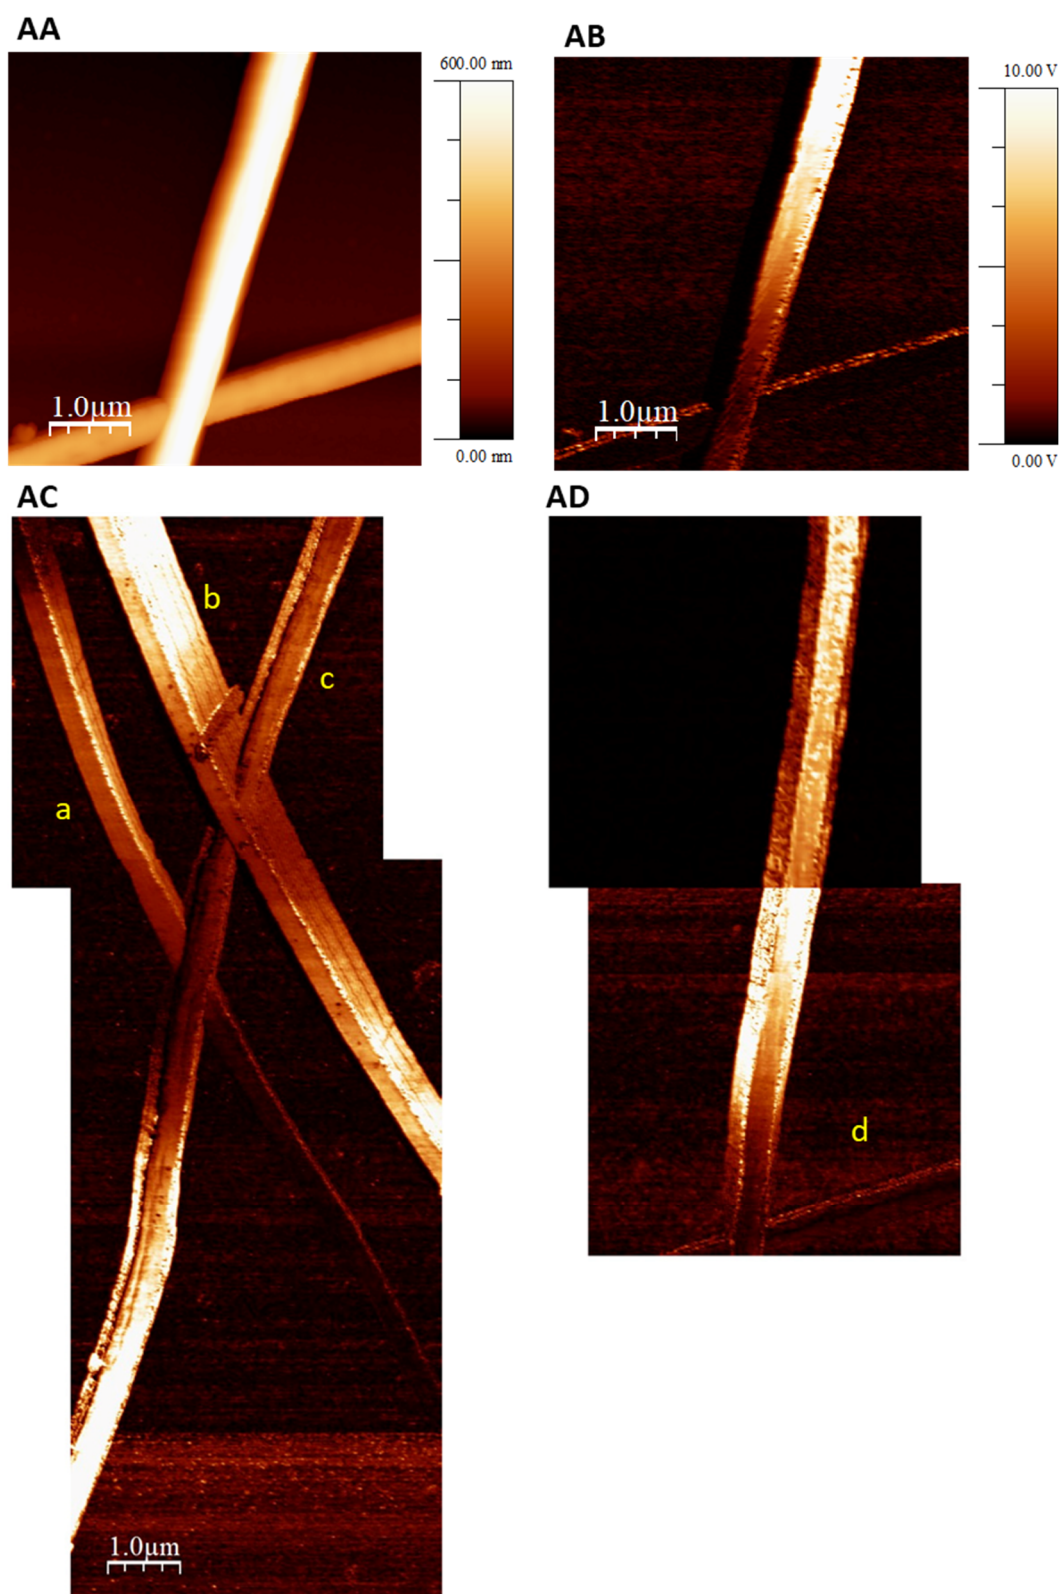

**Figure S1 (part D).** (AA) Topography: PAN1 fiber, diameter 550 nm; PAN1 fiber, diameter 320 nm; (AB) PFM, Scale 1 V = 22 pm/V. (AC-AD) Stitched PFM images: (AC) Topography: PAN1 (a) fiber, diameter 460 nm; PAN1 (b) fiber, diameter 680 nm; PAN1 (c) fiber, diameter 550 nm; (AD) Topography: PAN1 (d) fiber, diameter 320 nm.

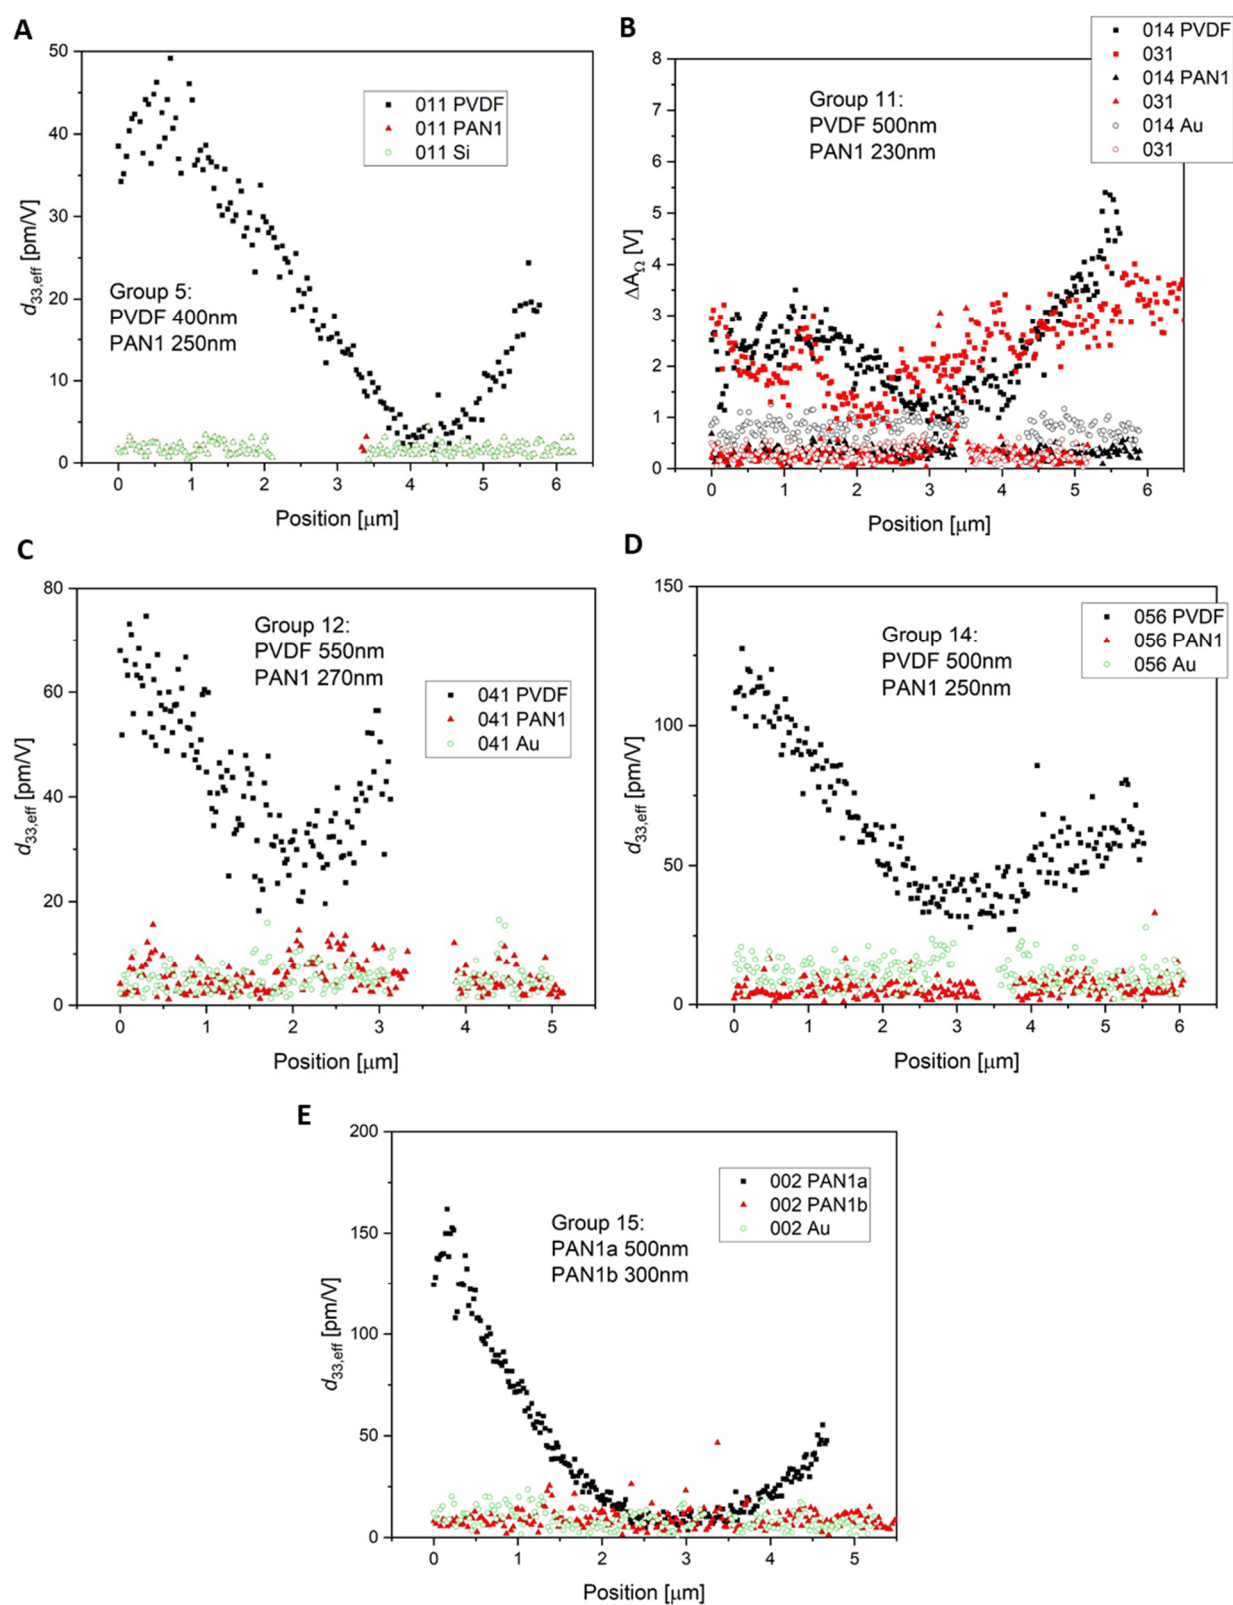

**Figure S2.** Line profiles of PFM signals along some of the fibers in Figure S1, namely: (A) Figure S1 (part A, H); (B) Figure S1 (part C, T), PFM, Scale 1 V = 29.3 pm/V; (C) Figure S1 (part C, V); (D) Figure S1 (part C, X); (E) Figure S1 (part C, Z).
